# Supplementary material for: Antimicrobial peptide GL13K immobilized onto SLA-treated titanium by silanization: antibacterial effect against methicillin-resistant Staphylococcus aureus (MRSA)
Source: Royal Society of Chemistry journal article supplement (doi:10.1039/d1ra04974g), 2022-01-01
Supplement: d1ra04974g1.pdf [file d1ra04974g1.pdf]

**Supplementary Material for**

**Antimicrobial peptide, GL13K, immobilized onto SLA-treated titanium  
by silanization: Antibacterial effect against methicillin-resistant  
*Staphylococcus aureus* (MRSA)**

Yusang Li,<sup>a</sup> Ruiying Chen,<sup>d</sup> Fushi Wang,<sup>ac</sup> Xinjie Cai<sup>\*ab</sup> and Yining Wang<sup>\*ab</sup>

<sup>a</sup>The State Key Laboratory Breeding Base of Basic Science of Stomatology (Hubei-MOST) and Key Laboratory of Oral Biomedicine Ministry of Education, School and Hospital of Stomatology, Wuhan University, Wuhan, China

<sup>b</sup>Hospital of Stomatology Wuhan University, Department of Prosthodontics, Wuhan, China

<sup>c</sup>Hospital of Stomatology Wuhan University, Department of Cariology and Endodontics, Wuhan, China

<sup>d</sup>Shanghai Ninth People's Hospital, Shanghai Jiao Tong University School of Medicine; College of Stomatology, Shanghai Jiao Tong University, Department of Implant Dentistry, Shanghai, China

<sup>\*</sup>Authors to whom any correspondence should be addressed.

E-mail: xinjie.cai@whu.edu.cn and wang.yn@whu.edu.cn

### S1. Minimum inhibitory concentration (MIC) test

Bacteria were prepared as described in the main article. After that, 90µl bacterial suspension was added to 10µl of 2-fold serial GL13K solution in 96-well plates. The final concentration of GL13K is from 2µg/ml to 2048µg/ml (2µg/ml to 4096µg/ml for MRSA). Bacteria suspension without GL13K and GL13K solution without bacteria was used as control. The plate was incubated at 37°C for 16h, then the OD value at 600nm (OD600) was determined by an ELX808 Ultra Microplate Reader (Bio-Tek Instruments, Inc., USA)

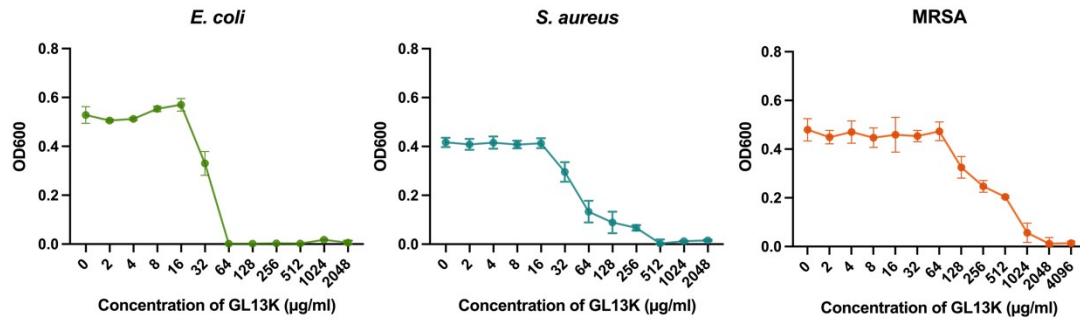

Fig. S1 MIC result of GL13K against *E. coli*, *S. aureus*, and MRSA.

### S2. Antibacterial study and in vitro cellular study of SSG1000 and SSG2000

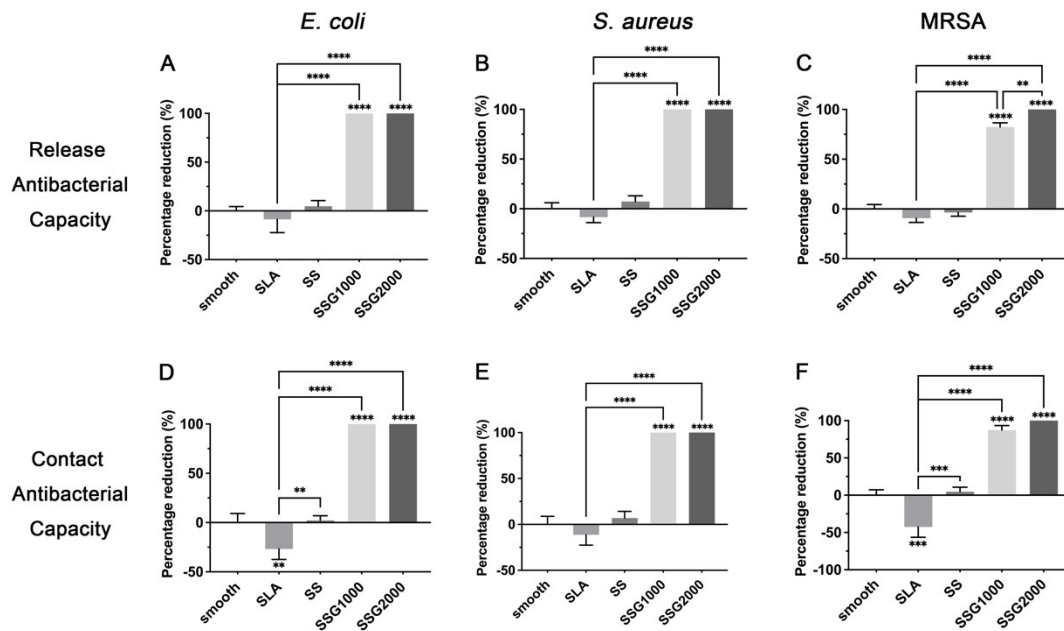

Fig. S2 The percentage reduction of *E. coli*, *S. aureus*, and MRSA in release and contact antibacterial experiment of SSG1000, SSG2000 and other samples. (\*\*p < 0.01, \*\*\*p < 0.005, \*\*\*\*p < 0.0001).

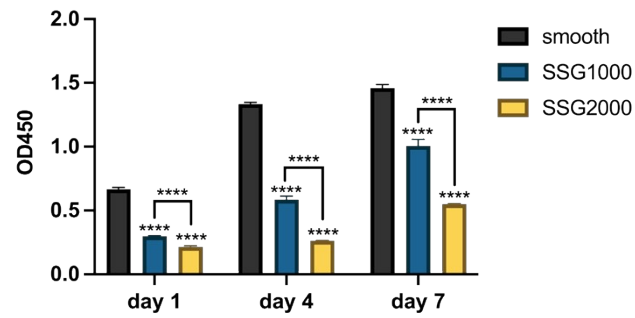

**Fig. S3** Proliferation of MC3T3-E1 cells culturing with the samples of Smooth, SSG1000, and SSG2000 groups. (\*\*\*\* $p < 0.0001$ ).

### S3. In vitro degradation test of GL13K at different concentrations

The GL13K was dissolved in PBS at different concentrations: 32  $\mu\text{g/ml}$ , 128  $\mu\text{g/ml}$ , and 512  $\mu\text{g/ml}$  and was incubated at 37°C. The initial A205 was measured, and at each pre-determined time interval, A205 of each sample was measured by an ELX808 Ultra Microplate Reader (Bio-Tek Instruments, Inc., USA).

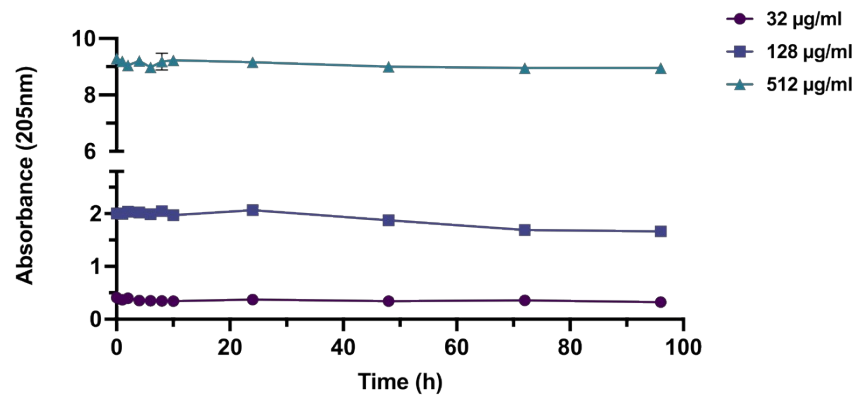

**Fig. S4** Degradation profile of GL13K at concentrations of 32  $\mu\text{g/ml}$ , 128  $\mu\text{g/ml}$ , and 512  $\mu\text{g/ml}$ .
